# Supplementary material for: Prediction of Human Pharmacokinetics of Antibody–Drug Conjugates From Nonclinical Data
Source: PubMed Central journal article supplement — Clin Transl Sci. 2019 Jun 11;12(5):534–44. doi: 10.1111/cts.12649 (PMC6742937; doi:10.1111/cts.12649), 2019-06-11
Supplement: CTS-12-534-s001.pdf [file CTS-12-534-s001.pdf]

## Supplementary Materials

Table S1. Median, 2.5<sup>th</sup>, 97.5<sup>th</sup> percentile of observed and predicted concentrations of total antibody over time following the first dose of DNIB0600A at 2.4 mg/kg

| Nominal Time (Day) | Observed concentration (µg/mL) |                  |                    | Predicted concentration (µg/mL) |                  |                    |
|--------------------|--------------------------------|------------------|--------------------|---------------------------------|------------------|--------------------|
|                    | Median                         | 2.5th percentile | 97.5 th percentile | Median                          | 2.5th percentile | 97.5 th percentile |
| 0.083              | 46.5                           | 19.7             | 70.8               | 66.2                            | 34.0             | 133                |
| 0.23               | 37.9                           | 18.9             | 62.8               | 32.2                            | 18.2             | 71.2               |
| 2                  | 20.5                           | 5.6              | 33.3               | 16.8                            | 11.1             | 24.4               |
| 7                  | 7.36                           | 3.56             | 11.9               | 6.77                            | 3.68             | 11.1               |
| 10                 | 4.99                           | 2.64             | 9.48               | 5.16                            | 2.79             | 8.52               |
| 14                 | 3.24                           | 1.08             | 5.49               | 3.72                            | 1.94             | 6.28               |
| 17                 | 2.52                           | 0.747            | 4.68               | 2.94                            | 1.41             | 5.16               |
| 21                 | 1.73                           | 0.704            | 4.02               | 2.17                            | 0.891            | 4.04               |

Concentration-time profiles of total antibody were scaled from cynomolgus monkey using species-invariant time method approach with exponent of 1.0 and 1.0 for CL and V, respectively.
