# Supplementary material for: Prediction of Human Pharmacokinetics of Antibody–Drug Conjugates From Nonclinical Data
Source: PubMed Central journal article supplement — Clin Transl Sci. 2019 Jun 11;12(5):534–44. doi: 10.1111/cts.12649 (PMC6742937; doi:10.1111/cts.12649), 2019-06-11
Supplement: CTS-12-534-s002.pdf [file CTS-12-534-s002.pdf]

## Supplementary Materials

Table S2. Median, 2.5<sup>th</sup>, 97.5<sup>th</sup> percentile of observed and predicted concentrations of conjugate analyte (measured as antibody-conjugated MMAE [acMMAE]) over time following the first dose of DNIB0600A at 2.4 mg/kg

| Time  | Observed concentration (ng/mL) |                  |                    | Predicted concentration (ng/mL) |                  |                    |
|-------|--------------------------------|------------------|--------------------|---------------------------------|------------------|--------------------|
|       | Median                         | 2.5th percentile | 97.5 th percentile | Median                          | 2.5th percentile | 97.5 th percentile |
| 0.083 | 900                            | 378              | 1290               | 1010                            | 504              | 2085               |
| 0.23  | 590                            | 302              | 1020               | 471                             | 259              | 1077               |
| 2     | 290                            | 178              | 432                | 216                             | 129              | 327                |
| 7     | 65.6                           | 31.8             | 113.0              | 37.4                            | 14.3             | 78.2               |
| 10    | 41.2                           | 20.4             | 74.7               | 22.4                            | 9.2              | 48.0               |
| 14    | 22.3                           | 10.3             | 36.4               | 13.6                            | 5.9              | 29.1               |
| 17    | 15.7                           | 5.21             | 28.1               | 9.7                             | 3.96             | 21.1               |
| 21    | 9.48                           | 1.78             | 22.6               | 6.45                            | 2.07             | 14.5               |

Concentration-time profiles of acMMAE were scaled from cynomolgus monkey using species-invariant time method approach with exponent of 1.0 and 1.0 for CL and V, respectively.
